# Supplementary material for: Etiological Approach to Characterization of Diabetes Type
Source: Oxford University Press journal article supplement (doi:10.2337/dc10-2324), 2011-06-03
Supplement: dc102324supplementarydata.pdf [file dc102324supplementarydata.pdf]

## SUPPLEMENTARY DATA

### Writing Group Acknowledgements

The writing group for this manuscript wishes to acknowledge the contributions of the following individuals to the SEARCH for Diabetes in Youth Study:

*California:* Jean M. Lawrence, ScD, MPH, MSSA, Kristi Reynolds, PhD, MPH, Jin-Wen Hsu, PhD, Mary Helen Black, PhD, and Marlene Y. Gonzalez, MPH, for the Department of Research and Evaluation and Ann K. Kershner, MD for the Department of Pediatrics, Kaiser Permanente Southern California; and David J. Pettitt, MD, for the Sansum Diabetes Research Institute

*Colorado:* Dana Dabelea, MD, PhD, Richard F. Hamman, MD, DrPH, Lisa Testaverde, MS, and Nancy West, PhD, for the Department of Epidemiology, Colorado School of Public Health, University of Colorado Denver, Georgeanna J. Klingensmith, MD, Marian J. Rewers, MD, PhD, David Maahs, MD and Paul Wadwa, MD for the Barbara Davis Center for Childhood Diabetes, Stephen Daniels, MD, PhD, Kristen Nadeau, MD, Department of Pediatrics and Children's Hospital, Clifford A. Bloch, MD, for the Pediatric Endocrine Associates, William C Knowler, MD, Dr.PH and Peter H. Bennett, MD, FRCP, for the NIDDK Pima Indian Study, Carmelita Sorrelman, MSPH for the Navajo Area Indian Health Prevention Program

*Hawaii:* Beatriz L. Rodriguez, MD, PhD, Beth Waitzfelder, PhD, Wilfred Fujimoto, MD, J. David Curb, MD, Fiona Kennedy, RN, Greg Uramoto, MD, Sorrell Waxman, MD, Teresa Hillier, MD, Richard Chung, MD, for Kuakini Medical Center

*Ohio:* Lawrence M. Dolan, MD, Michael Seid, PhD, Nancy Crimmins, MD, Debra A. Standiford, MSN, CNP for the Cincinnati Children's Hospital Medical Center

*South Carolina:* Elizabeth J. Mayer-Davis, PhD, Joan Thomas MS, RD for the University of North Carolina, Chapel Hill, Anwar Merchant, ScD, Angela D. Liese, PhD, MPH, Robert McKeown, PhD, Robert R. Moran, PhD, Deborah Truell, RN, CDE, Gladys Gaillard-McBride, RN, CFNP, Deborah Lawler, MT (ASCP), Vikki Rumph, CMA, Malaka Jackson, MD for the University of South Carolina, Lynne Hartel, MA, Yaw Appiagyei-Dankah, MD, Lyndon Key, MD, for the Medical University of South Carolina, Sarah Robbins, RN, James Amrhein, MD, for Greenville Hospital Systems, Pam Clark, MD for McLeod Pediatric Subspecialists, Mark Parker, MD for Pediatric Endocrinology & Diabetes Specialists, Charlotte, NC, Pediatric Endocrinology at the Medical College of Georgia, I. David Schwartz, MD

*Washington:* Catherine Pihoker, MD, Angela Badaru, MD, Lisa Gilliam, MD, PhD, Irl Hirsch, MD, Lenna L. Liu, MD, MPH, Dimitri Christakis, MD, MPH, and Joyce Yi-Frazier, PhD for the University of Washington, Beth Loots, MPH, MSW, Stacey Bryant, RN, Rebecca O'Connor, RN, Ellen Braun-Kelly, AA, Amber Sexton, BS, Sharla Semana, BS, and Mona Yaptangco, BS for Seattle Children's, and Carla Greenbaum, MD for Benaroya Research Institute

*Centers for Disease Control and Prevention:* Giuseppina Imperatore, MD, PhD, Desmond E. Williams, MD, PhD, Henry S. Kahn, MD, Bernice Moore, MBA, Gregg W. Edward, PhD, Sharon H. Saydah, PhD

*National Institute of Diabetes and Digestive and Kidney Diseases, NIH:* Barbara Linder, MD, PhD

*Central Laboratory (University of Washington):* Santica M. Marcovina, PhD, ScD,

Vinod P. Gaur, PhD, Kathy Gadbois

## SUPPLEMENTARY DATA

*Coordinating Center (Wake Forest University School of Medicine):* Ronny Bell, PhD, MS, Ralph D'Agostino, Jr., PhD, Douglas Case, PhD, Timothy Morgan, PhD, Michelle J. Naughton, PhD., Susan Moxley, BS, Gena Hargis, MPH, Andrea Anderson, MS, Cralen Davis, MS, Jeanette Andrews, MS, Jennifer W. Talton, MS

--Grant Support: SEARCH for Diabetes in Youth is funded by the Centers for Disease Control and Prevention (PA number 00097 and DP-05-069) and supported by the National Institute of Diabetes and Digestive and Kidney Diseases.

--Site Contract Numbers: Kaiser Permanente Southern California (U01 DP000246), University of Colorado Denver (U01 DP000247), Kuakini Medical Center (U01 DP000245), Children's Hospital Medical Center (Cincinnati) (U01 DP000248), University of North Carolina at Chapel Hill (U01 DP000254), University of Washington School of Medicine (U01 DP000244), Wake Forest University School of Medicine (U01 DP000250).

--The authors wish to acknowledge the involvement of General Clinical Research Centers (GCRC) at the Medical University of South Carolina (Grant Number M01 RR01070); Seattle Children's and the University of Washington School of Medicine (Grant Number M01RR00037 and M01RR001271); Colorado Pediatric General Clinical Research Center (Grant Number M01 RR00069); and the Institutional Clinical and Translational Science Award (CTSA), NIH/NCRR at the University of Cincinnati (Grant Number 1UL1RR026314-01).
